# Supplementary material for: The Impact of Different Self-Selected Walking Speeds on Muscle Synergies in Transfemoral Amputees during Transient-State Gait
Source: MDPI journal article supplement (doi:10.3390/biomechanics4010002), 2024-01-11
Supplement: s1 [file s1]

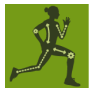

## 1. Supplementary Materials

### 1.1. Slow speed

The normality test results for the dataset of slow speeds indicate that the data follows a normal distribution ( $p$ -value = 0.93). Additionally, the area under the curve is reported to be 0.9, providing further insights into the distribution characteristics.

Table S1. Average of each participant's slow walking trials during the transient-state.

| Subjects   | Slow Speed (m/s) |
|------------|------------------|
| Subject 1  | 0.586            |
| Subject 2  | 0.575            |
| Subject 3  | 0.782            |
| Subject 4  | 0.618            |
| Subject 5  | 0.578            |
| Subject 6  | 0.494            |
| Subject 7  | 0.658            |
| Subject 8  | 0.501            |
| Subject 9  | 0.445            |
| Subject 10 | 0.710            |
| Subject 11 | 0.696            |

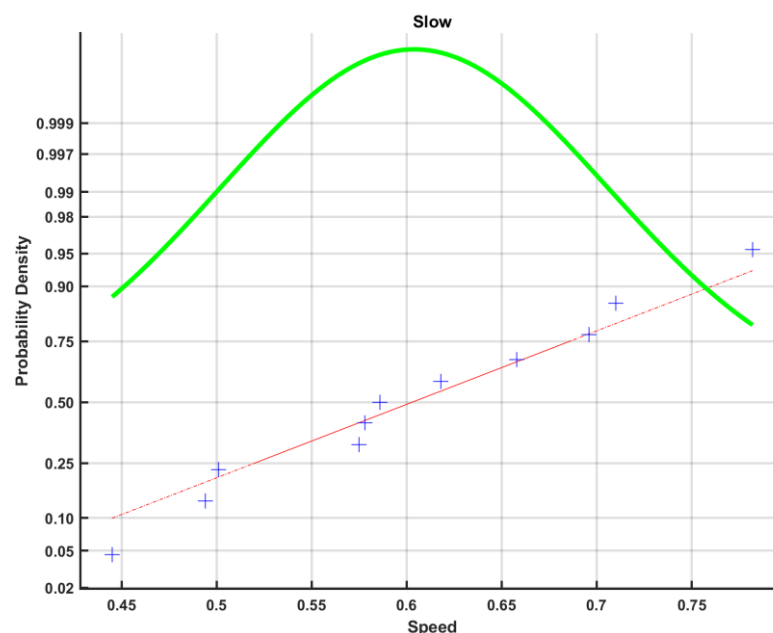

Figure S1. The probability density of TFA slow speed. Data points are indicated by + markers. The y-axis represents the probability density, while the x-axis corresponds to the speed values.

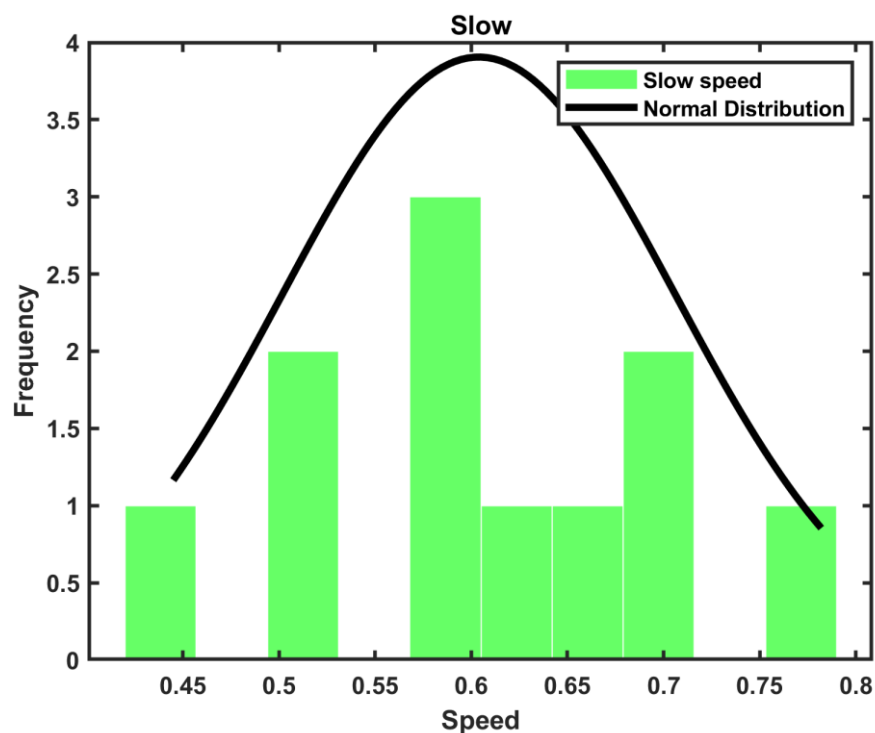

Figure S2. The green bars depict the observed distribution speed and the black curve represents the fitted normal distribution for TFA slow speed.

### 1.2. Normal speed

The normality test results for the dataset of normal speeds indicate that the data follows a normal distribution ( $p$ -value = 0.85). Additionally, the area under the curve is reported to be 0.93, providing further insights into the distribution characteristics.

Table S2. Average of each participant's normal walking speed during the transient-state.

| Subjects   | Normal Speed<br>(m/s) |
|------------|-----------------------|
| Subject 1  | 0.723                 |
| Subject 2  | 0.814                 |
| Subject 3  | 0.920                 |
| Subject 4  | 0.688                 |
| Subject 5  | 0.727                 |
| Subject 6  | 0.613                 |
| Subject 7  | 0.778                 |
| Subject 8  | 0.699                 |
| Subject 9  | 0.508                 |
| Subject 10 | 0.876                 |
| Subject 11 | 1.077                 |

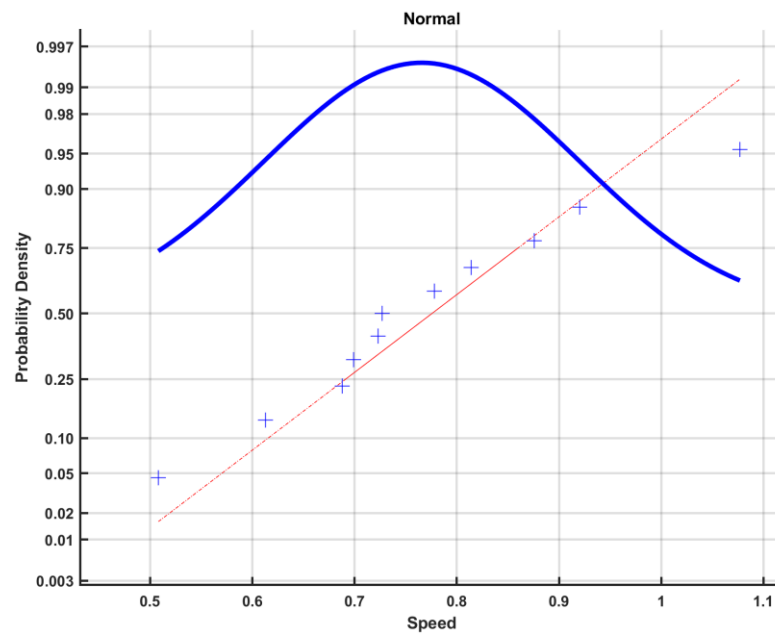

Figure S3. The probability density of TFA normal speed. Data points are indicated by + markers. The y-axis represents the probability density, while the x-axis corresponds to the speed values.

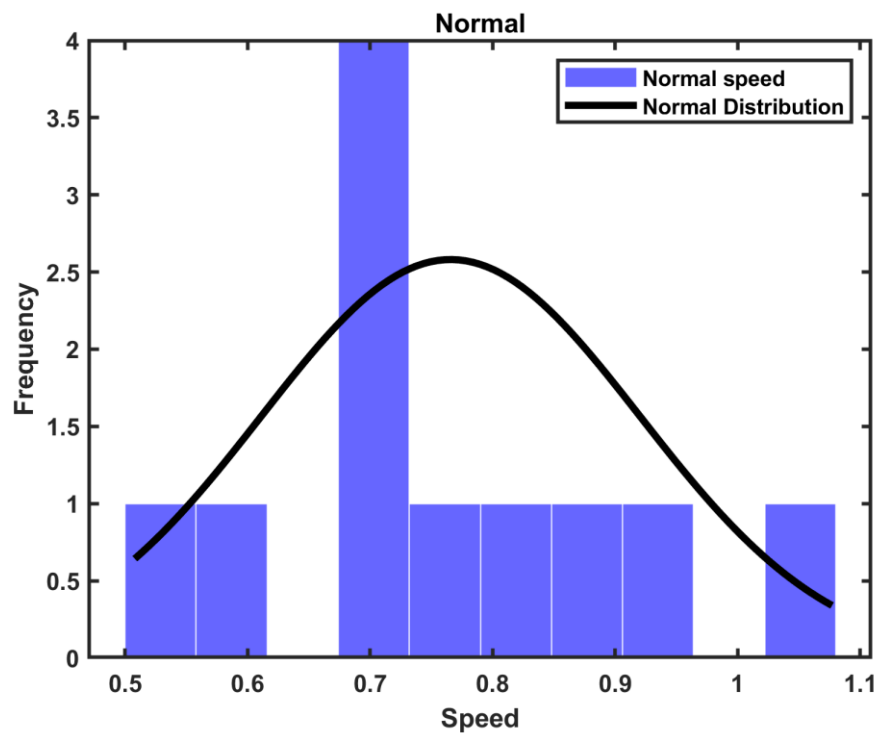

Figure S4. The blue bars depict the observed distribution speed and the black curve represents the fitted normal distribution for TFA normal speed.

### 1.3. Fast speed

The normality test results for the dataset of fast speeds indicate that the data follows a normal distribution ( $p$ -value = 0.99). Additionally, the area under the curve is reported to be 0.91, providing further insights into the distribution characteristics.

Table S3. Average of each participant's fast walking speed during the transient-state.

| Subjects   | Fast Speed (m/s) |
|------------|------------------|
| Subject 1  | 0.982            |
| Subject 2  | 1.029            |
| Subject 3  | 1.159            |
| Subject 4  | 0.885            |
| Subject 5  | 0.942            |
| Subject 6  | 0.748            |
| Subject 7  | 0.888            |
| Subject 8  | 1.011            |
| Subject 9  | 0.820            |
| Subject 10 | 1.065            |
| Subject 11 | 1.236            |

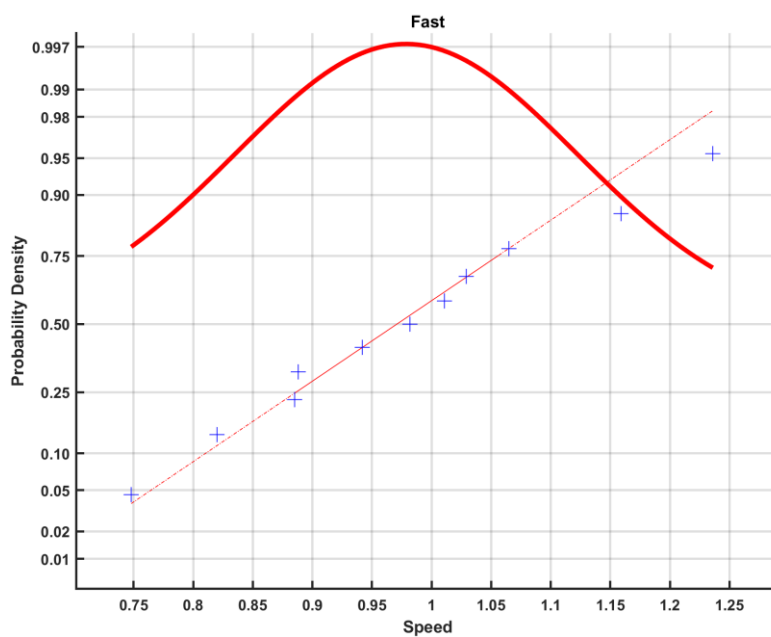

Figure S5. The probability density of TFA fast speed. Data points are indicated by + markers. The y-axis represents the probability density, while the x-axis corresponds to the speed values.

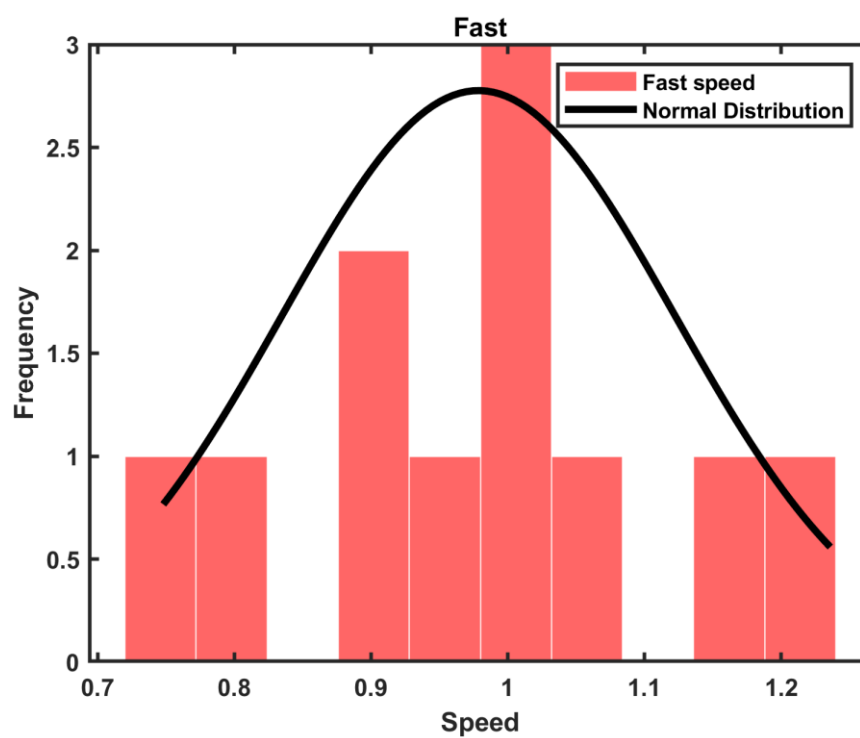

Figure S6. The red bars depict the observed distribution speed and the black curve represents the fitted normal distribution for TFA fast speed.
